# Supplementary material
Source: publisher site journal article supplement (https://www.dovepress.com/article/437396)
Supplement: Supplementary file 1 [file get_supplementary_file.php]

**Supplementary Figures**

**Supplementary Figure 1: Patient Disposition For The 6-month Follow-up Cohort**
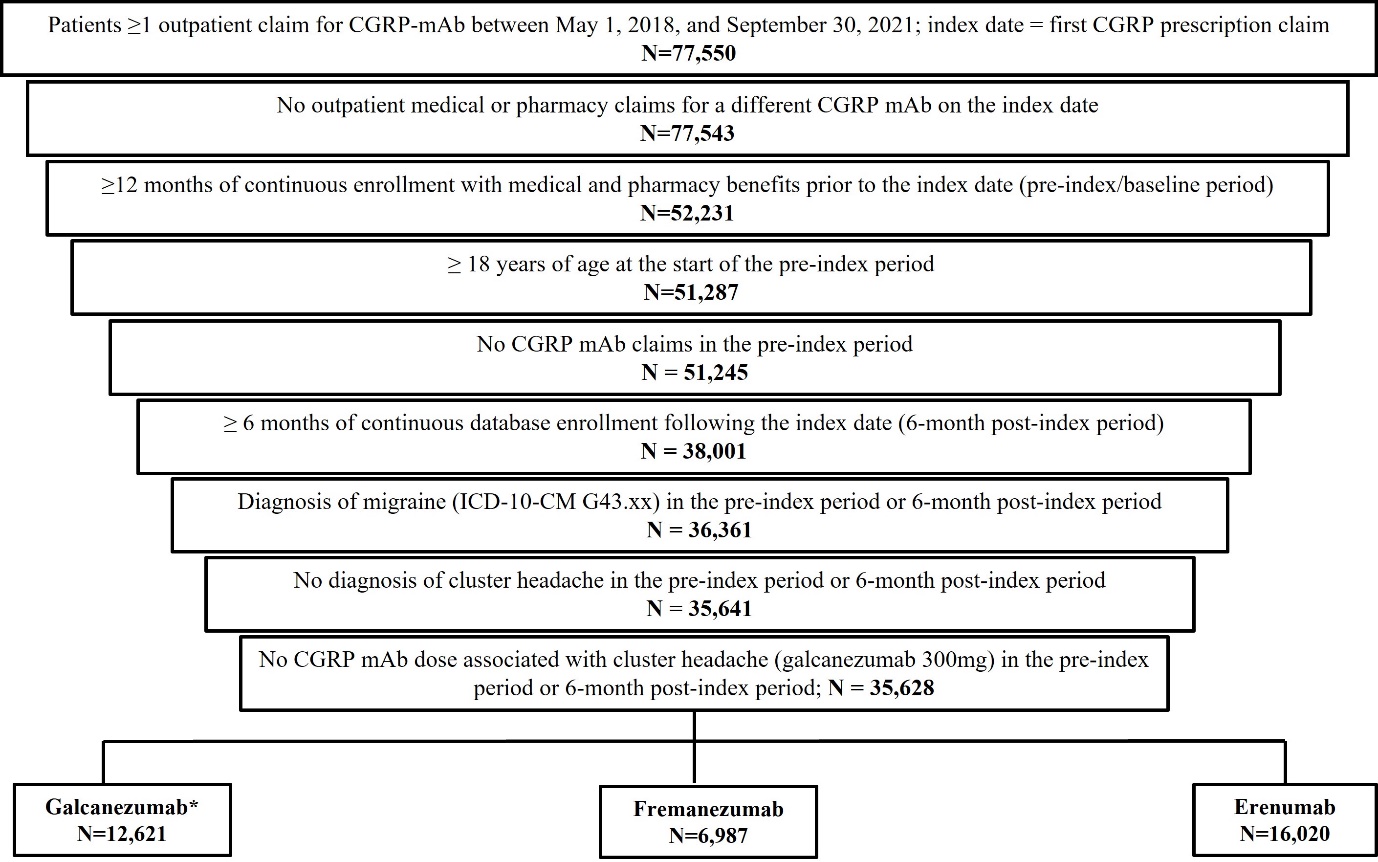


**Reference Cohort.*

**Supplementary Figure 2: Proportion of Patients That Remain Persistent to Index Drug During 6-month Follow-up**
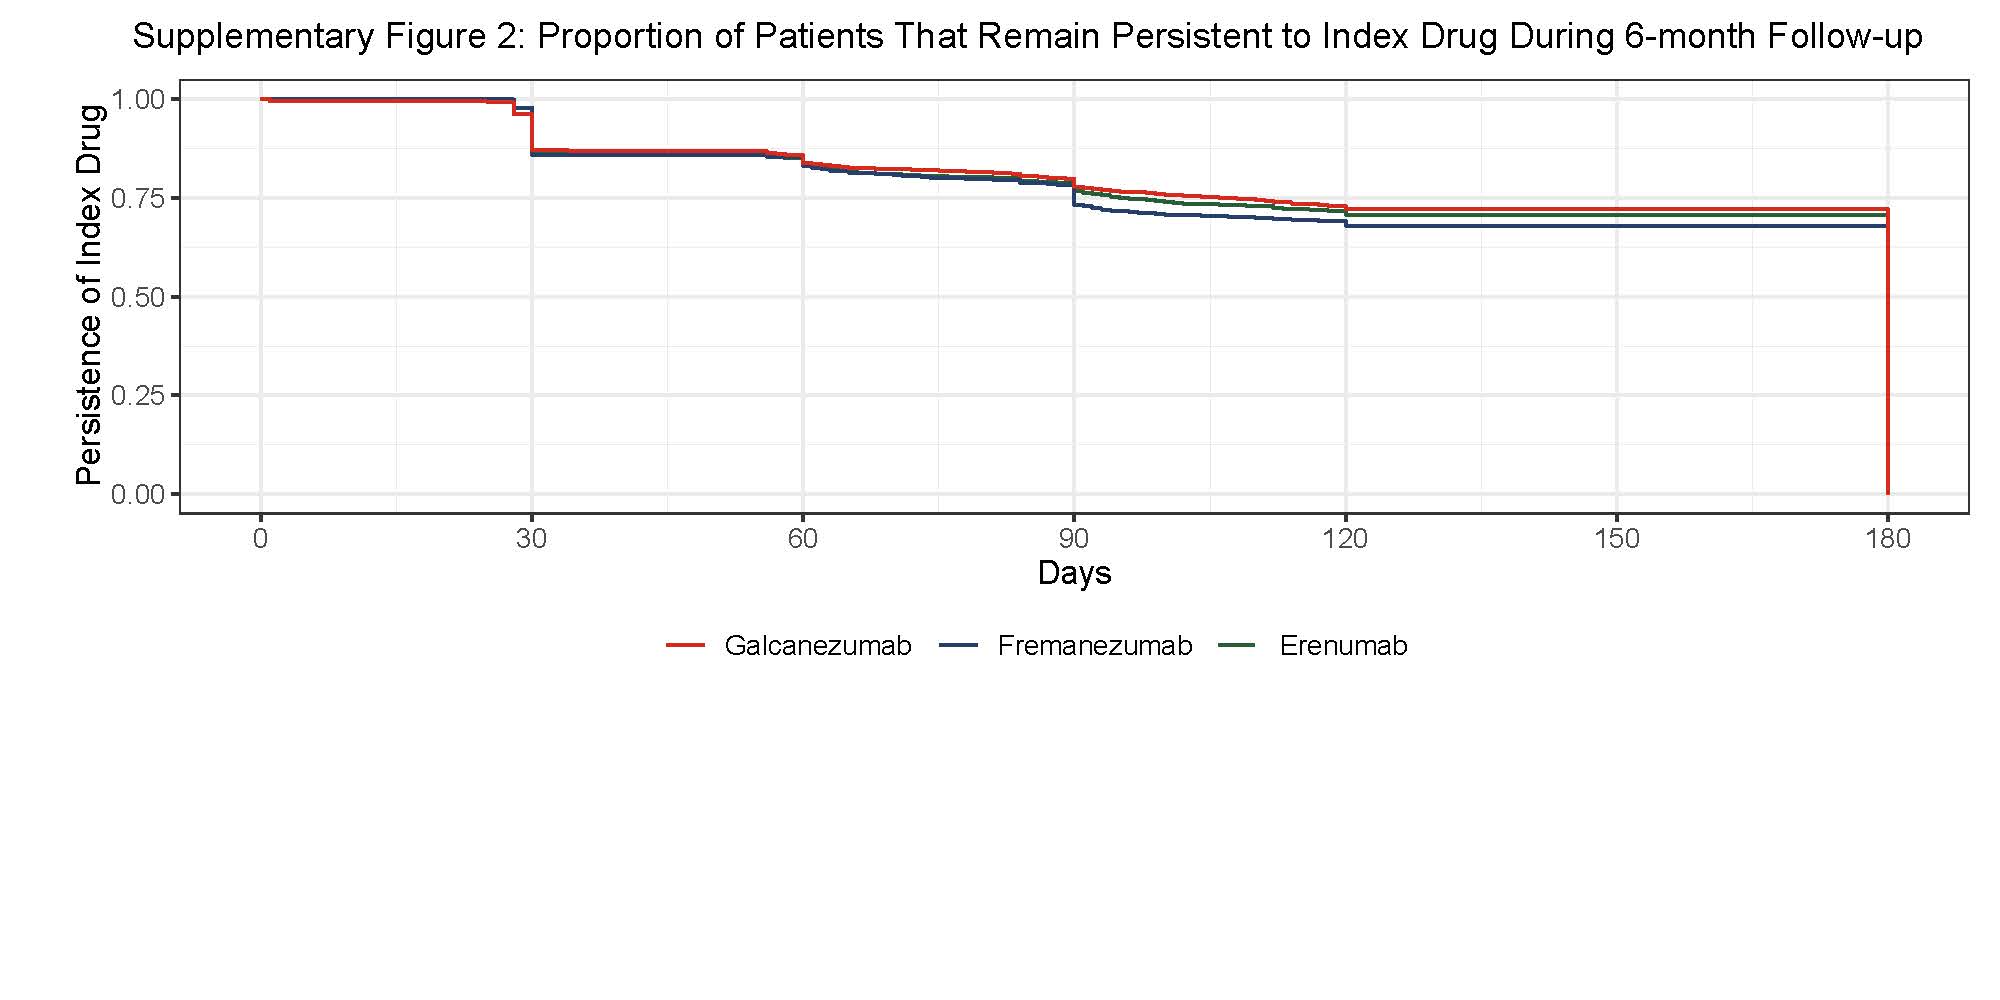


**Supplementary Figure 3: Common Therapies Switched To Over the 6-Month Follow-Up Period Post-matching *#**

**
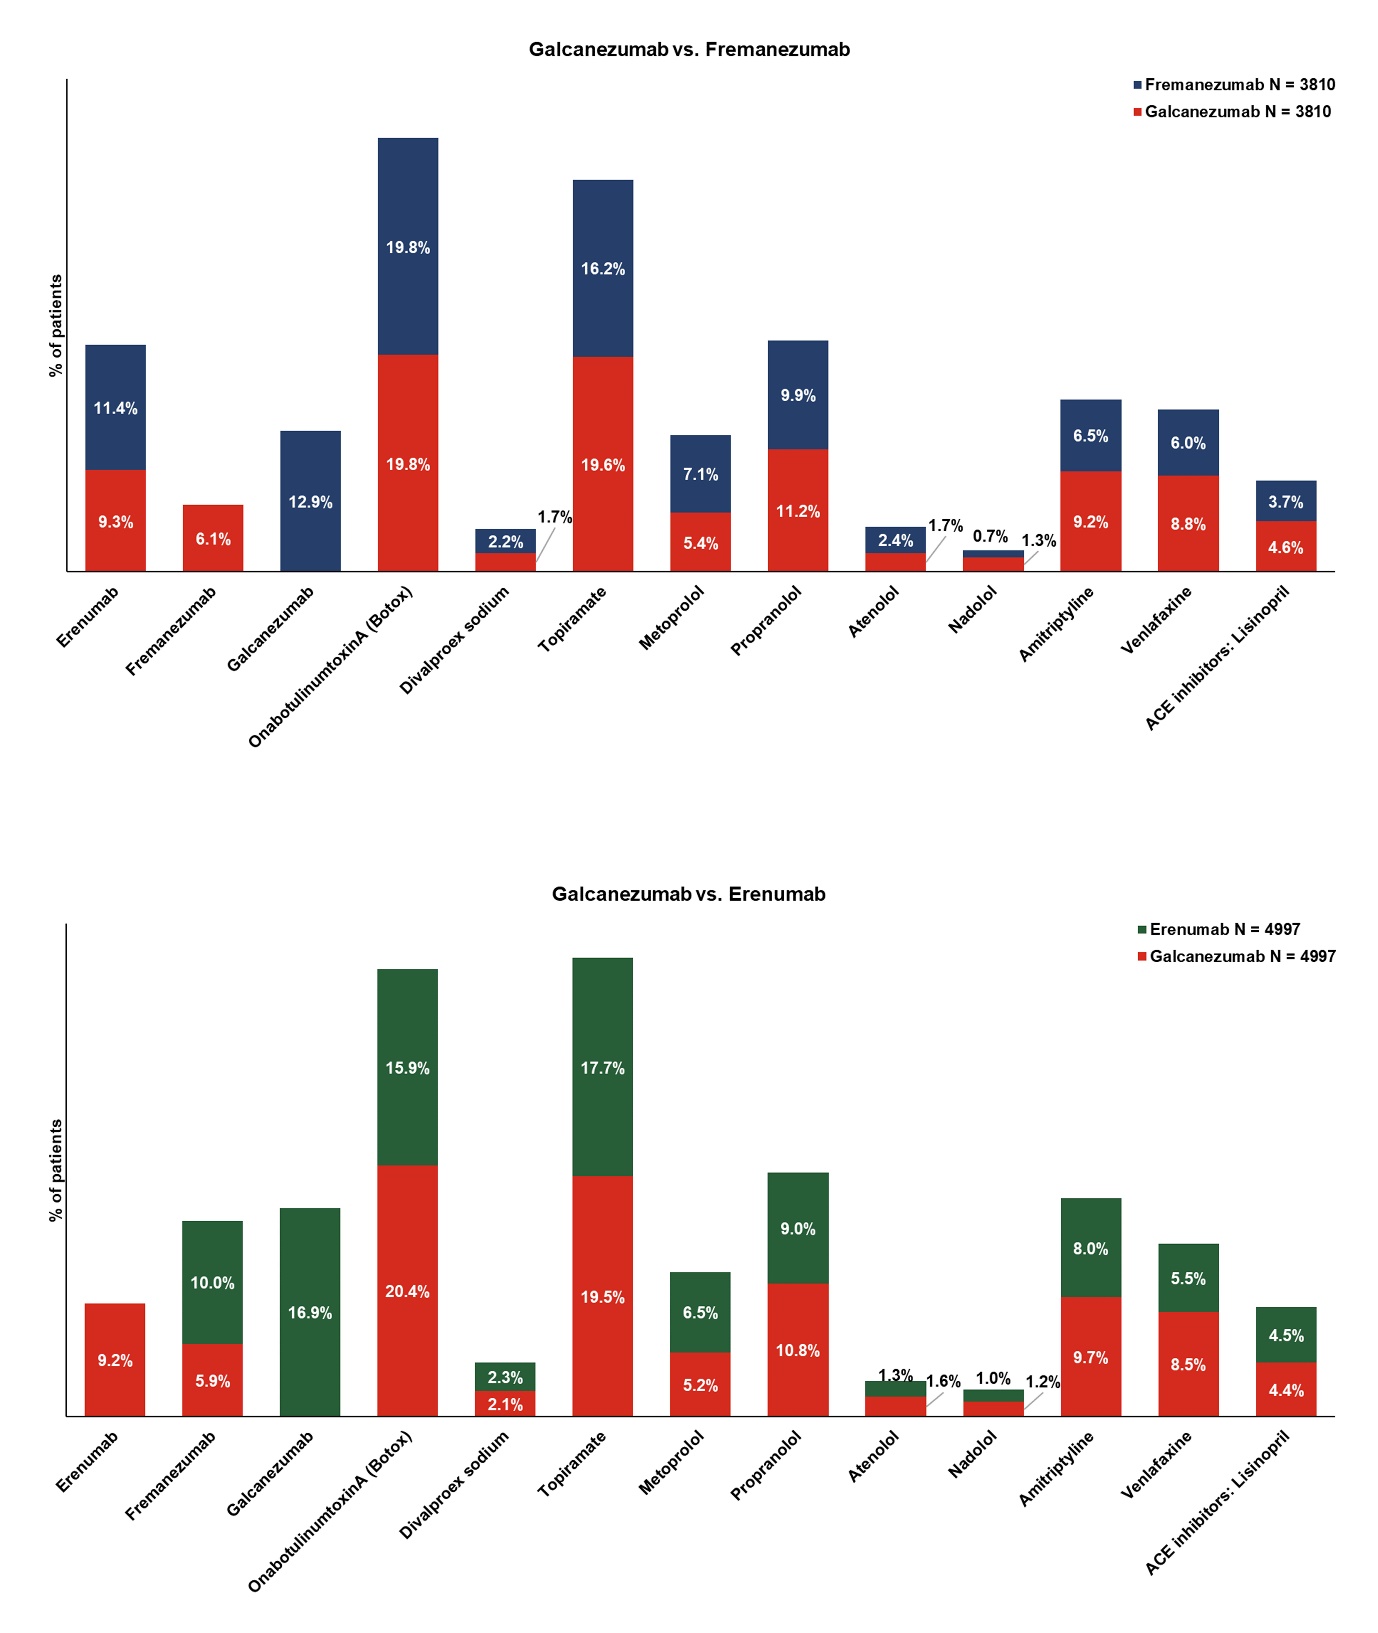
**

**For non-CGRP preventive therapies, drug classes with ≤3 patients were not presented in the graph. These include Eptinezumab, Divalproex sodium, Sodium valproate, Metoprolol, Propranolol, Atenolol, Amitriptyline, Venlafaxine, ACE inhibitors: Lisinopril.# Drugs classes were classified as follows: CGRP mAbs (Erenumab, Fremanezumab, Galcanezumab, Eptinezumab) and Non-CGRP mAb Migraine Treatment: Angiotensin receptor blockers (Candesartan); Antiepileptic drugs (Divalproex sodium, Sodium valproate, Topiramate); Beta-blockers (Metoprolol, Propranolol, Timolol, Atenolol, Nadolol); Antidepressants (Amitriptyline, Venlafaxine) and NMDA receptor antagonists (Memantine)*

**Supplementary Tables**

**Supplementary Table 1: List of Baseline and Follow-up Acute And Preventative Migraine Treatments**

| **American Headache Society (AHS) Consensus Acute Migraine Treatments** 16 |
| --- |
| ***Established efficacy*** |
| Triptans* |
| Ergotamine derivatives |
| Gepants (ubrogepant rimegepant, atogepant) |
| Lasmiditan |
| NSAIDs# (aspirin, celecoxib, diclofenac, ibuprofen, naproxen) |
| Non-opioid analgesics and combinations (eg. acetaminophen + aspirin + caffeine) |
| ***Probably effective*** |
| Ergotamine/other forms of dihydroergotamine |
| NSAIDs# (flurbiprofen, ketoprofen, and ketorolac intra-venous and intra-muscular) |
| Antiemetics (chlorpromazine, droperidol, metoclopramide, prochlorperazine, promethazine) |
| IV Magnesium |
| Isometheptene-containing compounds |
| **Additional acute treatments^** 17,18 |
| Opioids 10 |
| Barbiturates (eg. butalbital and combinations) |
| **AHS Consensus Preventative Migraine Treatments** |
| ***Established efficacy*** |
| Candesartan |
| OnabotulinumtoxinA (botox) |
| Antiepileptic drugs (divalproex sodium, sodium valproate, topiramate) |
| Beta-blockers (metoprolol, propranolol, timolol) |
| ***Probably effective*** |
| Antidepressants (amitriptyline, venlafaxine) |
| Memantine |
| Lisinopril |
| Beta-blockers (atenolol, nadolol) |

**Includes triptans as well as triptan combinations (e.g. triptan/naproxen sodium); # Only prescription NSAIDs are reflected in claims; this study will not be able to assess over the counter NSAID use; ^Although these drug classes are not listed medications with evidence of efficacy as acute or preventative migraine treatments, they were included to capture real world prescribing patterns. These drug classes were also examined in the acute medication overuse variable. Further, opioids were included as an acute treatment with established efficacy in the AHS Consensus recommendations and guidelines published in 2019, which is within the study period of this study.10*

**Supplementary Table 2: Patient Demographics and Baseline Clinical Characteristics For The 6-month Follow-up Cohort: Galcanezumab versus Fremanezumab**

|  | **Pre-Matching** | | | **Post-Matching** | | |
| --- | --- | --- | --- | --- | --- | --- |
| **Galcanezumab** | **Fremanezumab** | **Standard Differenceb** | **Galcanezumab** | **Fremanezumab** | **Standard Difference** |
| **N=12,621** | **N=6,987** | **N=3,810** | **N=3,810** |
| **Demographic characteristicsa** | | | | | | |
| **Age, years (Mean, SD)** | 43.7±11.5 | 44.2±11.4 | 4.39 | 43.9±10.0 | 44.0±11.4 | 0.16 |
| **Female (N, %)** | 11,052, 87.6% | 6,129, 87.7% | 0.46  0.46 | 3,298, 86.6% | 3,298, 86.6% | 0.00  0.00 |
| **Geographic region (N, %)** |  |  |  |  |  |  |
| Northeast | 1,170, 9.3 | 770, 11.0% | 5.80 | 389, 10.2% | 359, 9.4% | 2.65 |
| North Central | 2,893, 22.9% | 1,167, 16.7% | 15.65 | 795, 20.9% | 674, 17.7% | 8.02 |
| South | 7,064, 56.0% | 4,134, 59.2% | 6.47 | 2,136, 56.1% | 2,263, 59.4% | 6.75 |
| West | 1,475, 11.7% | 911, 13.0% | 4.11 | 479, 12.6% | 512, 13.4% | 2.58 |
| Unknown | 19, 0.2% | 5, 0.1% | 2.37 | 12, 0.3% | 2, 0.1% | 5.93 |
| **Insurance plan type (N, %)** |  |  |  |  |  |  |
| Comprehensive/indemnity | 394, 3.1% | 223, 3.2% | 0.40 | 123, 3.2% | 120, 3.2% | 0.37 |
| EPO/PPO | 6,407, 50.8% | 3,724, 53.3% | 5.07 | 1,886, 49.5% | 2,011, 52.8% | 6.59 |
| POS/POS with capitation | 655, 5.2% | 414, 5.9% | 3.21 | 197, 5.2% | 192, 5.0% | 0.60 |
| HMO | 1,736, 13.8% | 802, 11.5% | 6.86 | 532, 14.0% | 464, 12.2% | 5.30 |
| CDHP/HDHP | 3,265, 25.9% | 1,752, 25.1% | 1.82 | 1,034, 27.1% | 979, 25.7% | 3.25 |
| Other/Unknown | 164, 1.3% | 72, 1.0% | 2.51 | 40, 1.0% | 44, 1.2% | 1.13 |
| **Index year (N, %)** |  | | | | | |
| 2018 | 486, 3.9% | 679, 9.7% | 23.49 | 243, 6.4% | 308, 8.1% | 6.59 |
| 2019 | 6,242, 49.5% | 3,588, 51.4% | 3.79 | 1,920, 50.4% | 1,780, 46.7% | 7.33 |
| 2020 | 4,822, 38.2% | 2,080, 29.8% | 17.88 | 1,327, 34.8% | 1,352, 35.5% | 1.37 |
| 2021 | 1,071, 8.5% | 640, 9.2% | 2.38 | 321, 8.4% | 370, 9.7% | 4.53  4.53 |
| **Clinical characteristics**c | | | | | | |
| **Deyo- Charlson Comorbidity Index (DCI) (Mean, SD)** | 0.6±1.1 | 0.6±1.1 | 2.04  2.04 | 0.6±1.0 | 0.6±1.1 | 2.24 |
| **Clinical conditions (N, %)** |  |  |  |  |  |  |
| Anxiety | 4,459, 35.3% | 2,497, 35.7% | 0.85  0.85 | 1,314, 34.5% | 1,397, 36.7% | 4.55  4.551.31 |
| Depression | 3,617, 28.7% | 1,974, 28.3% | 0.90  0.90 | 1,094, 28.7% | 1,071, 28.1% | 1.31 |
| Hypertension | 3,132, 24.8% | 1,823, 26.1% | 2.93  2.93 | 957, 25.1% | 1,029, 27.0% | 4.31 |
| Sleep disorders | 3,688, 29.2% | 2,118, 30.3% | 2.39  2.39 | 1,108, 29.1% | 1,149, 30.2% | 2.39 |
| Sinusitis | 3,377, 26.8% | 1,893, 27.1% | 0.76  0.76 | 1,014, 26.6% | 1,050, 27.6% | 2.16 |
| Gastroesophageal reflux disease (GERD) | 2,630, 20.8% | 1,452, 20.8% | 0.14  0.14 | 751, 19.7% | 741, 19.5% | 0.66  0.66 |

*CDHP: Consumer-driven health plan; EPO: Exclusive provider organization; HDHP: High deductible health plan; HMO: Health maintenance organization; POS: Point of service; PPO: Preferred provider organization; SD: Standard deviation.aDemographic characteristics were measured on the index date; bStandardized differences were multiplied by 100; thus, standardized differences >10 indicate imbalances between cohorts, c Clinical characteristics were measured during the 12-month pre-index period.*

**Supplementary Table 3: Patient Demographics and Baseline Clinical Characteristics For The 6-month Follow-up Cohort: Galcanezumab versus Erenumab**

|  | **Pre-Matching** | | | **Post-Matching** | | |
| --- | --- | --- | --- | --- | --- | --- |
| **Galcanezumab** | **Erenumab** | **Standard Differencb** | **Galcanezumab** | **Erenumab** | **Standard Difference** |
| **N=12,621** | **N=16,020** | **N=4,997** | **N=4,997** |
| **Demographic characteristicsa** | | | | | | |
| **Age, years (Mean, SD)** | 43.7±11.5 | 44.4±11.5 | 6.45 | 44.0±11.5 | 44.0±11.6 | 0.32  0.32 |
| **Female (N, %)** | 11,052, 87.6% | 13,867, 86.6% | 3.00  3.00 | 4,290, 85.9% | 4,290, 85.9% | 0.00  0.00 |
| **Geographic region (N, %)** |  |  |  |  |  |  |
| Northeast | 1,170, 9.3 | 1,740, 10.9% | 5.29 | 520, 10.4% | 481, 9.6% | 2.60 |
| North Central | 2,893, 22.9% | 3,672, 22.9% | 0.00 | 1,067, 21.4% | 958, 19.2% | 5.43 |
| South | 7,064, 56.0% | 8,561, 53.4% | 5.09 | 2,746, 55.0% | 2,904, 58.1% | 6.38 |
| West | 1,475, 11.7% | 2,020, 12.6% | 2.82 | 651, 13.0% | 643, 12.9% | 0.48 |
| Unknown | 19, 0.2% | 27, 0.2% | 0.45 | 13, 0.3% | 11, 0.2% | 0.82 |
| **Insurance plan type (N, %)** |  |  |  |  |  |  |
| Comprehensive/indemnity | 394, 3.1% | 453, 2.8% | 1.73 | 157, 3.1% | 129, 2.6% | 3.36 |
| EPO/PPO | 6,407, 50.8% | 8,644, 54.0% | 6.40 | 2,497, 50.0% | 2,692, 53.9% | 7.82 |
| POS/POS with capitation | 655, 5.2% | 989, 6.2% | 4.25 | 260, 5.2% | 273, 5.5% | 1.16 |
| HMO | 1,736, 13.8% | 2,043, 12.8% | 2.96 | 689, 13.8% | 647, 13.0% | 2.47 |
| CDHP/HDHP | 3,265, 25.9% | 3,657,22.8% | 7.09 | 1,341, 26.8% | 1,195, 23.9% | 6.72 |
| Other/Unknown | 164, 1.3% | 234, 1.5% | 1.38 | 53, 1.1% | 61, 1.2% | 1.51 |
| **Index year (N, %)** |  | | | | | |
| 2018 | 486, 3.9% | 3,896, 24.3% | 61.57 | 328, 6.6% | 512, 10.3% | 13.30 |
| 2019 | 6,242, 49.5% | 5,276, 32.9% | 34.05 | 2,448, 49.0% | 2,143, 42.9% | 12.27 |
| 2020 | 4,822, 38.2% | 5,686, 35.5% | 5.63 | 1,795, 35.9% | 1,939, 38.8% | 5.96 |
| 2021 | 1,071, 8.5% | 1,162, 7.3% | 4.58 | 426, 8.5% | 403, 8.1% | 1.67 |
| **Clinical characteristics**c | | | | | | |
| **Deyo- Charlson Comorbidity Index (DCI) (Mean, SD)** | 0.6±1.1 | 0.6±1.2 | 1.52  1.52 | 0.6±1.2 | 0.6±1.1 | 1.69  1.69 |
| **Clinical conditions (N, %)** |  |  |  |  |  |  |
| Anxiety | 4,459, 35.3% | 5,599, 35.0% | 0.80  0. | 1,742, 34.9% | 1,735, 34.7% | 0.29  0.29 |
| Depression | 3,617, 28.7% | 4,565, 28.5% | 0.36  0.363 | 1,433, 28.7% | 1,415, 28.3% | 0.80  0.80 |
| Hypertension | 3,132, 24.8% | 4,089, 25.5% | 1.63  1.63 | 1,262, 25.3% | 1,292, 25.9% | 1.38  1.38 |
| Sleep disorders | 3,688, 29.2% | 4,693, 29.3% | 0.16  0.16 | 1,478, 29.6% | 1,496, 29.9% | 0.79  0.79 |
| Sinusitis | 3,377, 26.8% | 4,044, 25.2% | 3.45  3.45 | 1,326, 26.5% | 1,275, 25.5% | 2.33  2.33 |
| Gastroesophageal reflux disease (GERD) | 2,630, 20.8% | 3,195, 19.9% | 2.22  2.22 | 983, 19.7% | 1,030, 20.6% | 2.35  2.35 |

*CDHP: Consumer-driven health plan; EPO: Exclusive provider organization; HDHP: High deductible health plan; HMO: Health maintenance organization; POS: Point of service; PPO: Preferred provider organization; SD: Standard deviation.aDemographic characteristics were measured on the index date; bStandardized differences were multiplied by 100; thus, standardized differences >10 indicate imbalances between cohorts,c Clinical characteristics were measured during the 12-month pre-index period.*

**Supplementary Table 4: Medications Used During 6-month Baseline And Follow-up Period**

|  | **6-month baseline** | | | | | | **6-month follow-up** | | | | | |
| --- | --- | --- | --- | --- | --- | --- | --- | --- | --- | --- | --- | --- |
|  | **Galcanezumab**  **N=3,810** | **Fremanezumab**  **N=3,810** | **Fremanezumab vs Galcanezumab p-Value** | **Galcanezumab**  **N=4,997** | **Erenumab,**  **N=4,997** | **Erenumab vs Galcanezumab**  **p-Value** | **Galcanezumab**  **N=3,810** | **Fremanezumab**  **N=3,810** | **Fremanezumab vs Galcanezumab**  **p-Value** | **Galcanezumab**  **N=4,997** | **Erenumab,**  **N=4,997** | **Erenumab vs Galcanezumab**  **p-Value** |
| **Any acute migraine treatment newly initiated (N, %)** | | | | | | | | | | | | |
| ***Established efficacy*** | | | | | | | | | | | | |
| Triptans | 2,581, 67.7% | 2,582, 67.8% | 0.971 | 3,387, 67.8% | 3,324, 66.5% | 0.180 | 1,936, 50.8% | 1,952, 51.2% | 0.714 | 2,553, 51.1% | 2,560, 51.2% | 0.889 |
| Ergotamine derivatives | 4, 0.1% | 14, 0.4% | 0.012 | 6, 0.1% | 14, 0.3% | 0.073 | 5, 0.1% | 5, 0.1% | - | 6, 0.1% | 9, 0.2% | 0.438 |
| Gepantsa | 120, 3.1% | 159, 4.2% | 0.016 | 164, 3.3% | 138, 2.8% | 0.129 | 271, 7.1% | 375, 9.8% | <0.001 | 370, 7.4% | 348, 7.0% | 0.394 |
| Lasmiditan | 6, 0.2% | 5, 0.1% | 0.763 | 8, 0.2% | 1, 0.0% | 0.039 | 16, 0.4% | 13, 0.3% | 0.639 | 20, 0.4% | 8, 0.2% | 0.023 |
| Non-opioid analgesics and combinationsb | 2,318, 60.8% | 2,362, 62.0% | 0.295 | 3,018, 60.4% | 3,107, 62.2% | 0.068 | 1,618, 42.5% | 1,633, 42.9% | 0.728 | 2,101, 42.1% | 2,157, 43.2% | 0.257 |
| *NSAIDs* | 1,947, 51.1% | 1,945, 51.1% | 0.973 | 2,534, 50.7% | 2,531, 50.7% | 0.952 | 1,216, 31.9% | 1,239, 32.5% | 0.565 | 1,576, 31.5% | 1,614, 32.3% | 0.415 |
| *Isometheptene-containing compounds* | 13, 0.3% | 10, 0.3% | 0.531 | 16, 0.3% | 17, 0.3% | 0.862 | 1, 0.0% | 0, 0.0% | 1.000 | 1, 0.0% | 4, 0.1% | 0.375 |
| *Barbiturates (butalibtal-containing combinations#,** | 657, 17.2% | 698, 18.3% | 0.214 | 861, 17.2% | 896, 17.9% | 0.358 | 383, 10.0% | 393, 10.3% | 0.691 | 505, 10.1% | 548, 11.0% | 0.161 |
| Opioidsc,^ | 1,661, 43.6% | 1,779, 46.7% | 0.007 | 2,204, 44.1% | 2,339, 46.8% | 0.007 | 1,198, 31.4% | 1,260, 33.1% | 0.126 | 1,569, 31.4% | 1,605, 32.1% | 0.439 |
| ***Probably effective*** | | | | | | | | | | | | |
| Other forms of dihydroergotamine | 82, 2.1% | 67, 1.8% | 0.229 | 111, 2.2% | 97, 1.9% | 0.327 | 41, 1.1% | 45, 1.2% | 0.664 | 51, 1.0% | 65, 1.3% | 0.191 |
| Antiemetics | 1,240, 32.6% | 1,228, 32.2% | 0.769 | 1,627, 32.6% | 1,567, 31.4% | 0.198 | 679, 17.8% | 709, 18.6% | 0.365 | 890, 17.8% | 876, 17.5% | 0.713 |
| Magnesium, IV | 84, 2.2% | 109, 2.9% | 0.068 | 118, 2.4% | 119, 2.4% | 0.948 | 43, 1.1% | 49, 1.3% | 0.494 | 57, 1.1% | 55, 1.1% | 0.849 |
| **Any preventive migraine treatment newly initiated (N, %)** | | | | | | | | | | | | |
| ***Established efficacy*** | | | | | | | | | | | | |
| Candesartan | 27, 0.7% | 27, 0.7% | 0.945 | 36, 0.7% | 60, 1.2% | 0.014 | 21, 0.6% | 20, 0.5% | 0.876 | 28, 0.6% | 53, 1.1% | 0.005 |
| Onabotulinumtoxin A | 606, 15.9% | 528, 13.9% | 0.013 | 799, 16.0% | 704, 14.1% | 0.008 | 432, 11.3% | 414, 10.9% | 0.523 | 570, 11.4% | 497, 10.0% | 0.018 |
| Antiepileptic drugs | 1,503, 39.4% | 1,454, 38.2% | 0.254 | 1,955, 39.1% | 1,915, 38.3% | 0.411 | 860, 22.6% | 872, 22.9% | 0.743 | 1,122, 22.5% | 1,092, 21.9% | 0.470 |
| Beta-blockers | 848, 22.3% | 804, 21.1% | 0.221 | 1,108, 22.2% | 1,099, 22.0% | 0.828 | 593, 15.6% | 594, 15.6% | 0.962 | 776, 15.5% | 814, 16.3% | 0.299 |
| ***Probably effective*** |  |  |  |  |  |  |  |  |  |  |  |  |
| Antidepressants | 901, 23.6% | 936, 24.6% | 0.342 | 1,190, 23.8% | 1,186, 23.7% | 0.925 | 636, 16.7% | 638, 16.8% | 0.951 | 842, 16.9% | 826, 16.5% | 0.668 |
| Memantine | 33, 0.9% | 41, 1.1% | 0.350 | 44, 0.9% | 56, 1.1% | 0.228 | 26, 0.7% | 38, 1.0% | 0.132 | 36, 0.7% | 29, 0.6% | 0.384 |
| Lisinopril | 196, 5.1% | 194, 5.1% | 0.938 | 258, 5.2% | 263, 5.3% | 0.822 | 167, 4.4% | 174, 4.6% | 0.678 | 226, 4.5% | 239, 4.8% | 0.537 |
| Beta-blockers | 147, 3.9% | 127, 3.3% | 0.218 | 190, 3.8% | 187, 3.7% | 0.875 | 109, 2.9% | 98, 2.6% | 0.438 | 140, 2.8% | 136, 2.7% | 0.807 |

*The following medications were included within each drug class: Gepants: Ubrogepant, Rimegepant; NSAIDs: Aspirin, Celecoxib oral solution, Diclofenac, Ibuprofen, Naproxen, Flurbiprofen, Ketoprofen, Ketorolac, IV and IM; Antiemetics: Droperidol, Chlorpromazine, Metoclopramide, Prochlorperazine, Promethazine; Antiepileptic drugs: Divalproex sodium, Sodium valproate, Topiramate; Beta-blockers: Metoprolol, Propranolol, Timolol (Established efficacy); Antidepressants: Amitriptyline, Venlafaxine; Beta-blockers: Atenolol, Nadolol (Probably effective).*

*aAtogepant use was also examined, but no claims were found for any of the study participants. Atogepant was FDA approved September 28, 2021- two days before the end of the present study period; bIn addition to NSAIDS, isometheptene- containing compounds, and barbiturates, this category also contained other non-opioid analgesics acetaminophen, phenylbutazone, bromfenac sodium, salicylates, meloxicam, clonidine, diflunisal, etodolac, fenoprofen, indomethacin, meclofenamate, mefenamic acid, nabumetone, nepafenac, oxaprozin, oxyphenbutazone, piroxicam, rofecoxib, sulindac, suprofen, tolmentin, valdecoxib, and ziconotide acetate;cIncluded buprenorphine, butorphanol, codeine, dezocine, fentanyl, hydrocodone, hydromorphone, levomethadyl, levorphanol, meperidine, methadone, morphine, nalbuphine, oxycodone, oxymorphone, pentazocine, propoxyphene, tapentadol, tramadol, and combinations. #Bigal, M.E. and R.B. Lipton, Neurology, 2008. 71(22): p. 1821-1828,17 *Silberstein, S., et al. Cephalalgia, 2005. 25(6): p. 460-465,18 ^AHS Consensus Statement. Headache. 2018. doi: 10.1111/head.13456.10*

**Supplementary Table 5: Non-indexed Medications Newly Initiated During 6-month Follow-up Period**

|  | **Galcanezumab**  **N=3,810** | **Fremanezumab**  **N=3,810** | **Fremanezumab vs Galcanezumab**  **p-Value** | **Galcanezumab**  **N=4,997** | **Erenumab**  **N=4,997** | **Erenumab vs Galcanezumab**  **p-Value** |
| --- | --- | --- | --- | --- | --- | --- |
| **Any acute migraine treatment newly initiated during the follow-up (N, %)** | | | | | | |
| ***Established efficacy*** | | | | | | |
| Triptans | 159, 4.2% | 140, 3.7% | 0.262 | 206, 4.1% | 198, 4.0% | 0.685 |
| Ergotamine derivatives | 4, 0.1% | 2, 0.1% | 0.687 | 5, 0.1% | 4, 0.1% | 1.000 |
| Gepantsa | 194, 5.1% | 260, 6.8% | 0.001 | 268, 5.4% | 268, 5.4% | 1.000 |
| Lasmiditan | 11, 0.3% | 10, 0.3% | 0.827 | 14, 0.3% | 8, 0.2% | 0.200 |
| Non-opioid analgesics and combinationsb | 263, 6.9% | 265, 7.0% | 0.910 | 347, 6.9% | 361, 7.2% | 0.585 |
| *NSAIDs* | 267, 7.0% | 305, 8.0% | 0.099 | 352, 7.0% | 399, 8.0% | 0.075 |
| *Isometheptene-containing compounds* | 0, 0.0% | 0, 0.0% | 1.000 | 0, 0.0% | 0, 0.0% | 1.000 |
| *Barbiturates (butalibtal-containing combinations)#,** | 64, 1.7% | 80, 2.1% | 0.164 | 82, 1.6% | 99, 2.0% | 0.202 |
| Opioids c,^ | 341, 9.0% | 302, 7.9% | 0.108 | 435, 8.7% | 382, 7.6% | 0.053 |
| ***Probably effective*** | | | | | | |
| Other forms of dihydroergotamine | 23, 0.6% | 26, 0.7% | 0.667 | 27, 0.5% | 32, 0.6% | 0.514 |
| Antiemetics | 207, 5.4% | 213, 5.6% | 0.763 | 268, 5.4% | 276, 5.5% | 0.724 |
| Magnesium, IV | 29, 0.8% | 32, 0.8% | 0.651 | 38, 0.8% | 38, 0.8% | 1.000 |
| **Any preventive migraine treatment newly initiated during the follow-up (N, %)** | | | | | | |
| ***Established efficacy*** | | | | | | |
| Candesartan | 7, 0.2% | 8, 0.2% | 0.693 | 8, 0.2% | 10, 0.2% | 0.637 |
| Onabotulinumtoxin A | 103, 2.7% | 104, 2.7% | 0.944 | 135, 2.7% | 130, 2.6% | 0.756 |
| Antiepileptic drugs | 81, 2.1% | 85, 2.2% | 0.724 | 108, 2.2% | 108, 2.2% | 1.000 |
| Beta-blockers | 88, 2.3% | 98, 2.6% | 0.458 | 113, 2.3% | 137, 2.7% | 0.124 |
| ***Probably effective*** | | | | | | |
| Antidepressants | 120, 3.1% | 86, 2.3% | 0.018 | 155, 3.1% | 131, 2.6% | 0.150 |
| Memantine | 12, 0.3% | 13, 0.3% | 0.761 | 16, 0.3% | 5, 0.1% | 0.016 |
| Lisinopril | 26, 0.7% | 30, 0.8% | 0.592 | 37, 0.7% | 37, 0.7% | 1.000 |
| Beta-blockers | 7, 0.2% | 19, 0.5% | 0.018 | 11, 0.2% | 15, 0.3% | 0.432 |

*The following medications were included within each drug class: Gepants: Ubrogepant, Rimegepant; NSAIDs: Aspirin, Celecoxib oral solution, Diclofenac, Ibuprofen, Naproxen, Flurbiprofen, Ketoprofen, Ketorolac, IV and IM; Antiemetics: Droperidol, Chlorpromazine, Metoclopramide, Prochlorperazine, Promethazine; Antiepileptic drugs: Divalproex sodium, Sodium valproate, Topiramate; Beta-blockers: Metoprolol, Propranolol, Timolol (Established efficacy); Antidepressants: Amitriptyline, Venlafaxine; Beta-blockers: Atenolol, Nadolol (Probably effective).*

*aAtogepant use was also examined, but no claims were found for any of the study participants. Atogepant was FDA approved September 28, 2021- two days before the end of the present study period; bIn addition to NSAIDS, isometheptene- containing compounds, and barbiturates, this category also contained other non-opioid analgesics acetaminophen, phenylbutazone, bromfenac sodium, salicylates, meloxicam, clonidine, diflunisal, etodolac, fenoprofen, indomethacin, meclofenamate, mefenamic acid, nabumetone, nepafenac, oxaprozin, oxyphenbutazone, piroxicam, rofecoxib, sulindac, suprofen, tolmentin, valdecoxib, and ziconotide acetate;cIncluded buprenorphine, butorphanol, codeine, dezocine, fentanyl, hydrocodone, hydromorphone, levomethadyl, levorphanol, meperidine, methadone, morphine, nalbuphine, oxycodone, oxymorphone, pentazocine, propoxyphene, tapentadol, tramadol, and combinations. #Bigal, M.E. and R.B. Lipton, Neurology, 2008. 71(22): p. 1821-1828,17 *Silberstein, S., et al. Cephalalgia, 2005. 25(6): p. 460-465,18 ^AHS Consensus Statement. Headache. 2018. doi: 10.1111/head.13456.10*

**Supplementary Table 6: Acute Medication Overuse During 6-month Baseline And Follow-up Period**

|  | **6-month baseline** | | | | | | **6-month follow-up** | | | | | |
| --- | --- | --- | --- | --- | --- | --- | --- | --- | --- | --- | --- | --- |
|  | **Galcanezumab**  **N=3,810** | **Fremanezumab**  **N=3,810** | **Fremanezumab vs Galcanezumab**  **p-Value** | **Galcanezumab**  **N=4,997** | **Erenumab,**  **N=4,997** | **Erenumab vs Galcanezumab**  **p-Value** | **Galcanezumab**  **N=3,810** | **Fremanezumab**  **N=3,810** | **Fremanezumab vs Galcanezumab**  **p-Value** | **Galcanezumab**  **N=4,997** | **Erenumab**  **N=4,997** | **Erenumab vs Galcanezumab**  **p-Value** |
| Any Overuse (Opioids, Triptans, Barbiturates, or Combination) | 2,071, 54.4% | 2,188, 57.4% | 0.007 | 2,708, 54.2% | 2,737, 54.8% | 0.560 | 1,995, 52.4% | 2,065, 54.2% | 0.106 | 2,623, 52.5% | 2,720, 54.4% | 0.052 |
| Opioids (≥8 days possession per month) | 356, 9.3% | 427, 11.2% | 0.007 | 471, 9.4% | 520, 10.4% | 0.101 | 349, 9.2% | 423, 11.1% | 0.005 | 459, 9.2% | 503, 10.1% | 0.136 |
| Triptans (≥5 days possession per month) | 1,594, 41.8% | 1,645, 43.2% | 0.237 | 2,081, 41.6% | 2,101, 42.1% | 0.685 | 1,477, 38.8% | 1,486, 39.0% | 0.823 | 1,953, 39.1% | 2,023, 40.5% | 0.153 |
| Barbiturates (≥8 days possession per month) | 121, 3.2% | 141, 3.7% | 0.209 | 159, 3.2% | 181, 3.6% | 0.225 | 119, 3.1% | 138, 3.6% | 0.228 | 160, 3.2% | 202, 4.0% | 0.025 |
| Combination overuse* | 1,719, 45.1% | 1,868, 49.0% | 0.001 | 2,250, 45.0% | 2,307, 46.2% | 0.252 | 1,675, 44.0% | 1,768, 46.4% | 0.032 | 2,200, 44.0% | 2,267, 45.4% | 0.178 |

**Defined as possession of any combination of triptans, analgesics, ergotamines, and/or opioids within a 10 day period during follow-up period.*

**Supplementary Table 7: Treatment Patterns of Prescribed Index Treatment of Galcanezumab, Fremanezumab, or Erenumab During 6-month Follow-Up**

| **Treatment pattern** | **Post-match** | | | | | | | |
| --- | --- | --- | --- | --- | --- | --- | --- | --- |
| **Galcanezumab** | **Fremanezumab** | **Fremanezumab vs Galcanezumab** | | **Galcanezumab** | **Erenumab** | **Erenumab vs Galcanezumab** | |
| **N=3,810** | **N=3,810** | **N=4,997** | **N=4,997** |
| **p-value** | **Std Diff** | **p-value** | **Std Diff** |
| **Adherence to index drug** | | | | | | | | |
| Proportion of days covered (PDC) for index treatment (Mean, SD) | 0.7±0.2 | 0.7±0.3 | 0.485 | 1.599 | 0.7±0.3 | 0.7±0.3 | 0.808 | 0.485 |
| PDC ≥ 0.80 (N, %) | 2,087, 54.8% | 2,107 55.3% | <0.001 | 1.055 | 2730, 54.6% | 2,744, 54.9% | 0.531 | 0.563 |
| Medication possession ratio (MPR) for index treatment (Mean, SD) | 0.7±0.3 | 0.7±0.3 | 0.727 | 0.800 | 0.7±0.3 | 0.7±0.3 | 0.524 | 1.274 |
| MPR ≥ 0.80 (N, %) | 2,126, 55.8% | 2,130, 55.9% | <0.001 | 0.211 | 2,781, 55.7% | 2,771, 55.5% | 0.775 | 0.403 |
| **Persistence of index drug** | | | | | | | | |
| Days of persistent use, among all patients (Mean, SD) | 146.1±49.8 | 141.7±58.5 | 0.000 | 8.144 | 146.1±57.1 | 144.4±57.9 | 0.139 | 2.958 |
| Patients persistent throughout follow-up (N, %) | 2,746, 72.1% | 2,590, 68.0% | <0.001 | 8.946 | 3,601, 72.1% | 3,535, 70.7% | 0.144 | 2.923 |
| Patients persistent for at least 3 months, but less than 6 months (N, %) | 290, 7.6% | 388, 10.2% | <0.001 | 9.093 | 383, 7.7% | 395, 7.9% | 0.654 | 0.896 |
| **Discontinuation of index drug, 60-day gap** | | | | | | | | |
| Patients that discontinue index drug during follow-up (N, %) | 1,064, 27.9% | 1,220, 32.0% | <0.001 | 8.946 | 1,396, 27.9% | 1,462, 29.3% | 0.144 | 2.923 |
| **Switching to non-index preventive migraine treatment** | | | | | | | | |
| Switch to a non-index preventive migraine treatment during follow-up (N, %) | 434, 40.8% | 464, 38.0% | 0.178 | 5.644 | 575, 41.2% | 598, 40.9% | 0.876 | 0.582 |
| Days to switch (Mean, SD) | 100.6±34.5 | 99.7±37.3 | 0.724 | 2.362 | 100.6±39.4 | 101.0±41.7 | 0.871 | 0.949 |

*SD: Standard deviation*
